# Supplementary material for: Probing pollutant reactions at the iron surface: a case study on selenite reactions with nanoscale zero-valent iron
Source: Royal Society of Chemistry journal article supplement (doi:10.1039/d1en00458a), 2021-01-01
Supplement: d1en00458a2.pdf [file d1en00458a2.pdf]

Table S1 The kinetics equation and particle dispersion model parameters for Se(IV).

| Pseudo-first order |       |       | Pseudo-second order |       |       |
|--------------------|-------|-------|---------------------|-------|-------|
| $Q_e$              | $k_1$ | $R^2$ | $Q_e$               | $k_2$ | $R^2$ |
| 105.535            | 0.059 | 0.655 | 106.383             | 0.015 | 0.999 |

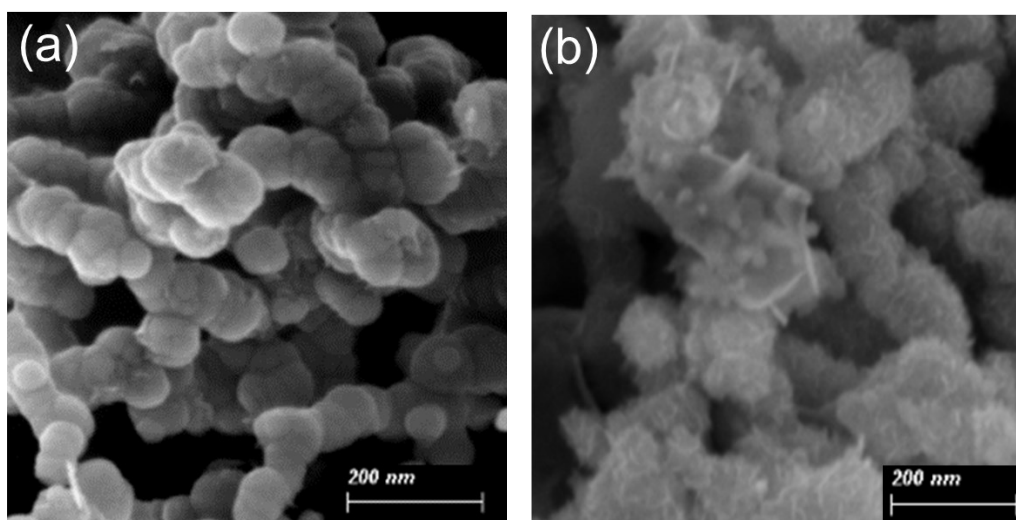

Fig. S1 Scanning electron microscope (SEM) of nZVI. (a) Fresh nZVI; (b) Spent nZVI after the reactions with partial sodium selenate solution (Se(IV)).

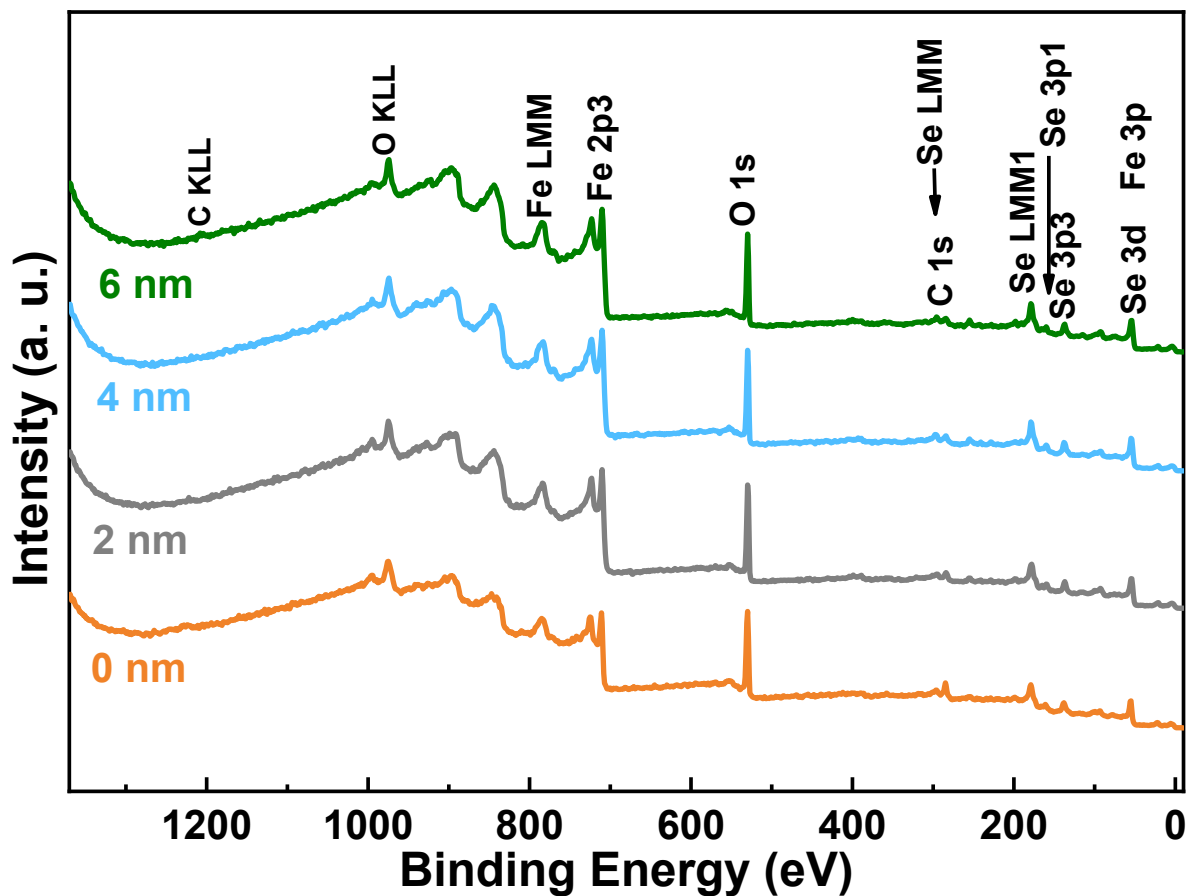

Fig. S2 Survey spectrum of HR-XPS spectra of Se-nZVI.  $[\text{Se(IV)}]_{\text{initial}} = 1.3 \text{ mM}$ ; the nZVI dose is  $1.0 \text{ g L}^{-1}$ , the  $\text{pH}_{\text{initial}}$  is 5.0, and the reaction time is 24 h.

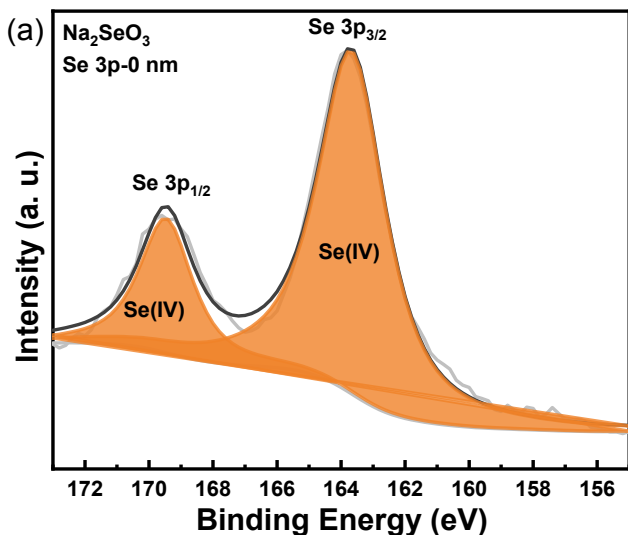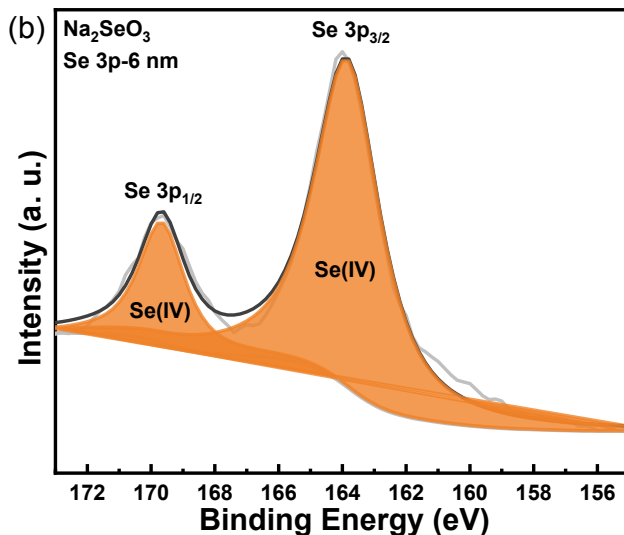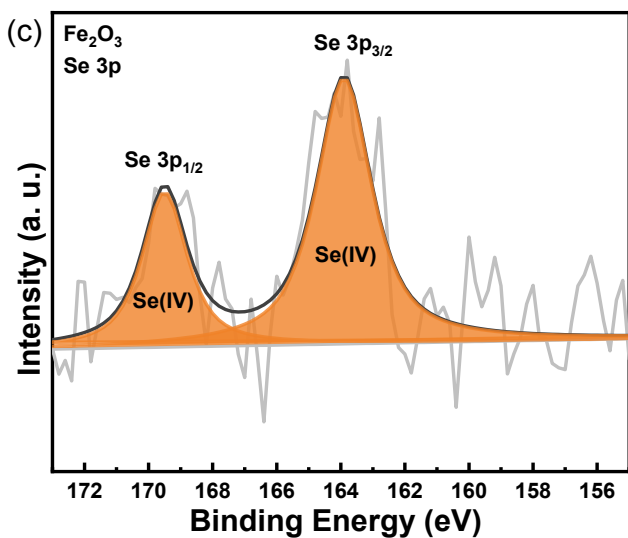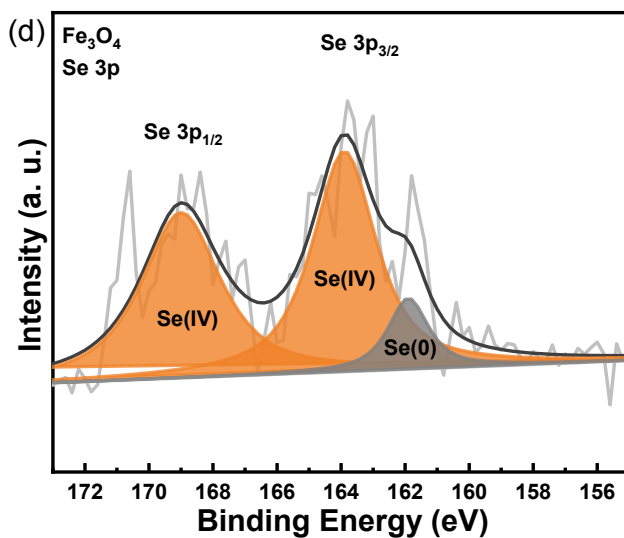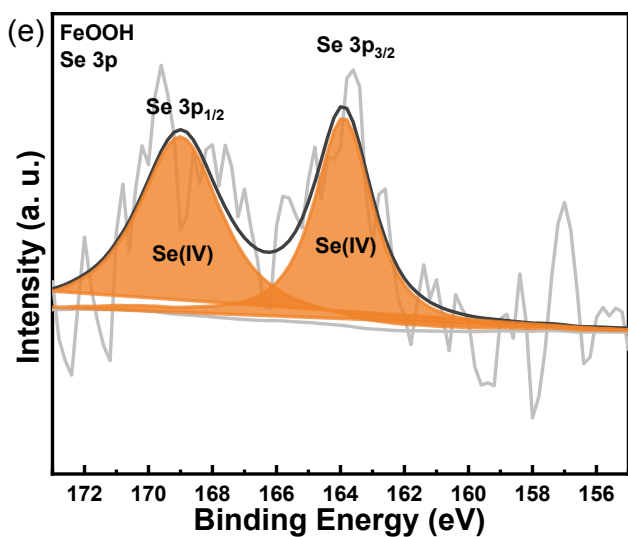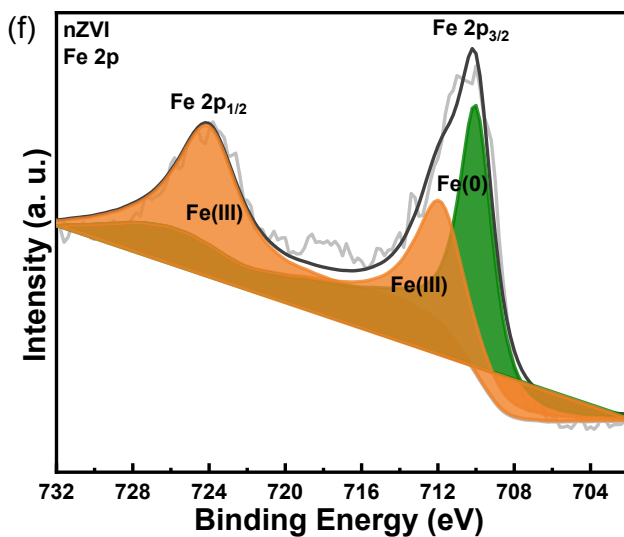

Fig. S3 HR-XPS spectra of Se 3p and Fe 2p species at oxide layer. (a) XPS spectra of Se 3p element in 0 nm of Na<sub>2</sub>SeO<sub>3</sub>; (b) XPS spectra of Se 3p element in 6 nm of Na<sub>2</sub>SeO<sub>3</sub>; (c) XPS spectra of Se 3p element in Fe<sub>2</sub>O<sub>3</sub>-Se(IV); (d) XPS spectra of Se 3p element in Fe<sub>3</sub>O<sub>4</sub>-Se(IV); (e) XPS spectra of Se 3p element in FeOOH-Se(IV); (f) XPS spectra of Fe 2p species in fresh nZVI. [Se(IV)]<sub>initial</sub> = 1.3 mM, the nZVI dose is 1.0 g L<sup>-1</sup>, the pH<sub>initial</sub> is 5.0, and the reaction time is 24 h.

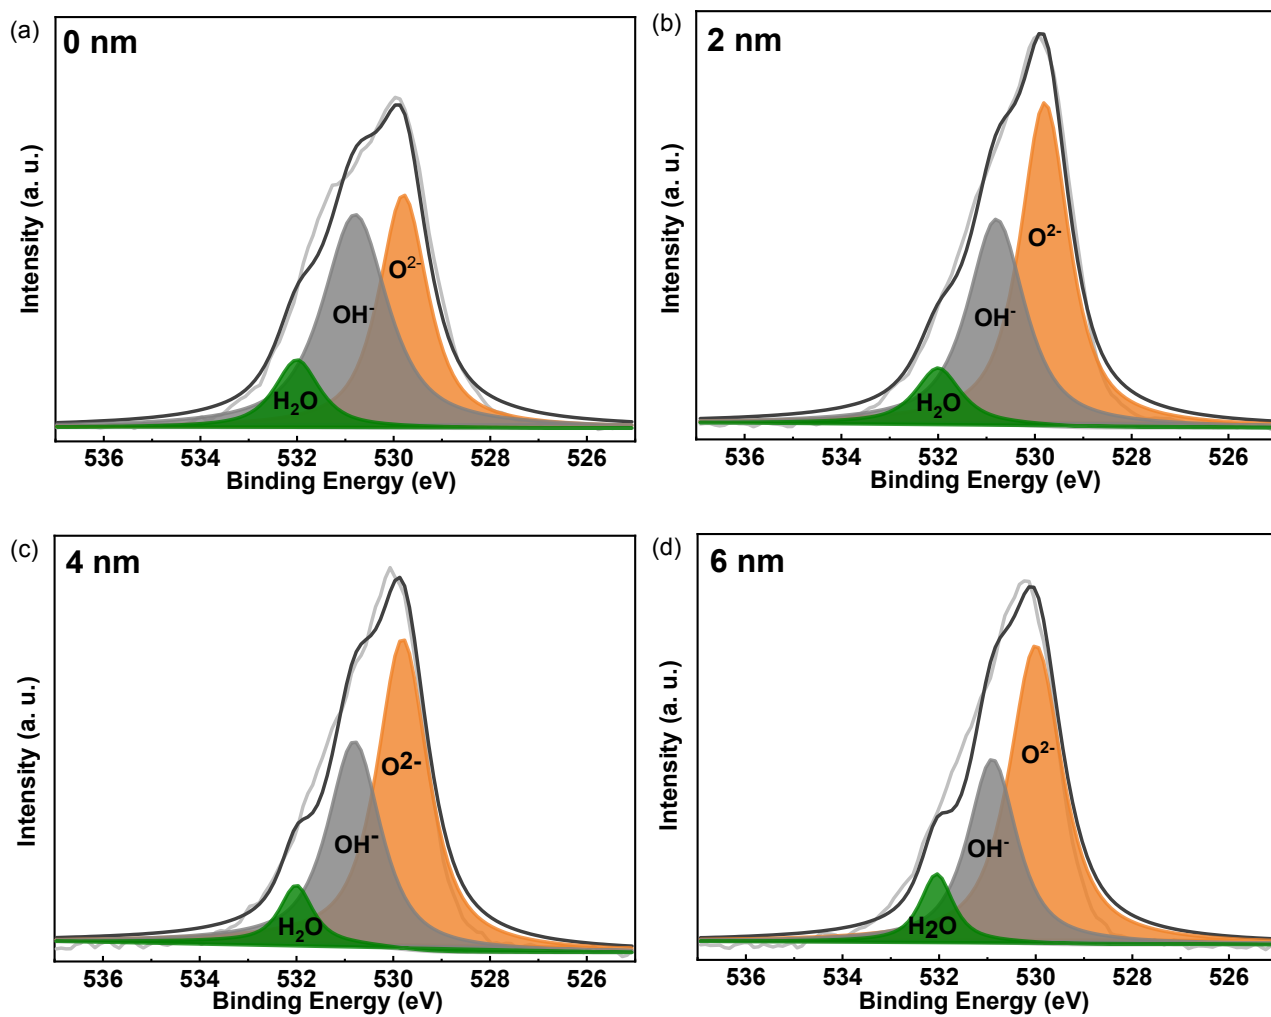

Fig. S4 HR-XPS spectra of O 1s species at selected depth. (a) 0 nm; (b) 2 nm; (c) 4 nm; (d) 6 nm.  $[\text{Se(IV)}]_{\text{initial}} = 1.3 \text{ mM}$ ; the nZVI dose is  $1.0 \text{ g L}^{-1}$ , the  $\text{pH}_{\text{initial}}$  is 5.0, and the reaction time is 24 h.
